# Supplementary material for: Postpartum breast cancer has a distinct molecular profile that predicts poor outcomes
Source: PubMed Central journal article supplement (PMC8566602; doi:10.1038/s41467-021-26505-3), 2021-11-03
Supplement: 41467_2021_26505_MOESM1_ESM.pdf [file 41467_2021_26505_MOESM1_ESM.pdf]

Supplemental figure 1

PP - NP

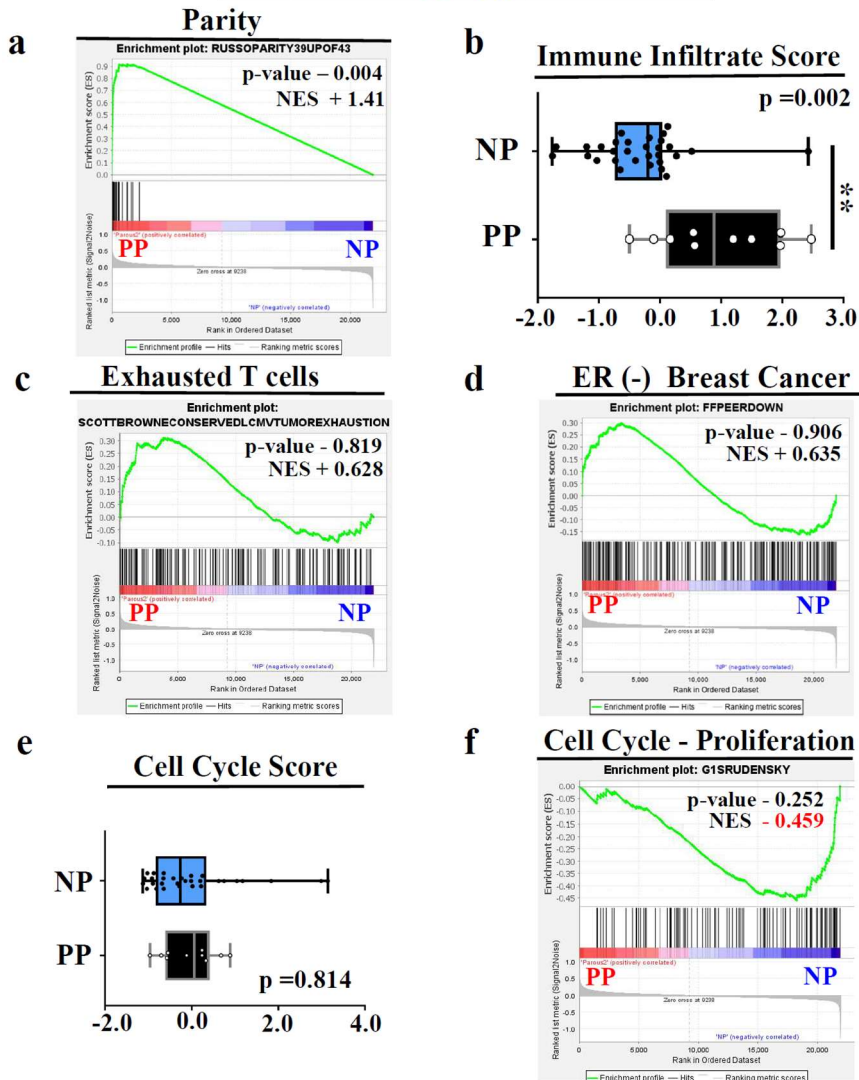

**Supplementary Figure 1 RNA expression comparison between postpartum and nulliparous breast tissue in healthy normal women:** Whole exome gene expression array data from healthy nulliparous (NP, blue, n = 30) or postpartum breast (PP, red, within 2 years of completed pregnancy, n= 10) tissues was obtained from a previous study (GEO-GSE26457). Data was normalized utilizing Transcriptome Analysis Console software (V.4.02, ThermoFisher Scientific). Gene set expression profiles or single sample scores for **a** parity (as if Fig 2f), **b** immune infiltrate (as in Fig 4a), **c** immune exhaustion (as if Fig 4g), **d** ER negative breast cancer (as in Fig 2d), **e** cell cycle (as in fig 3b) and **f** cell cycle (as in Fig 2a) are displayed. For enrichment plots p-values reported are nominal p-values reported by GSEA software with accompanying normalized enrichment scores (NES), while single sample p-values are from students' unpaired two-tailed t-test with Welch correction. For box and whisker plots (b,e), data are presented as minimum to maximum with median value marked by a line within the depicted interquartile range.

Supplemental figure 2

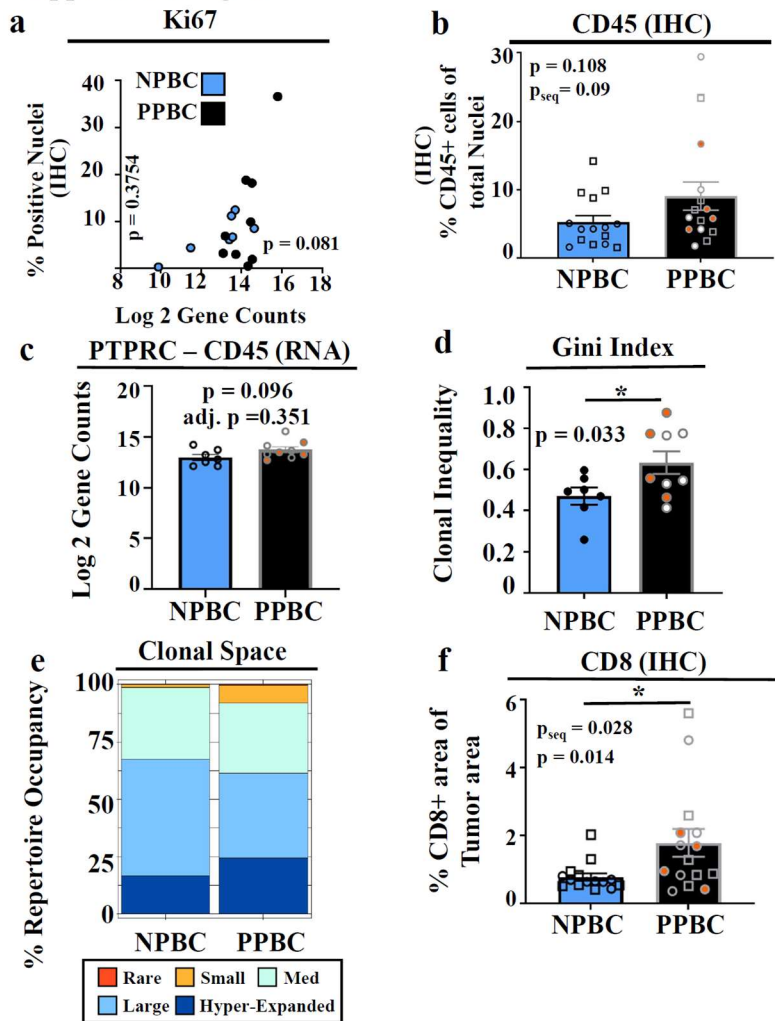

**Supplementary Figure 2 Proliferation, inflammation, CD8 T cell and T cell clonality comparison between PPBC and NPBC:** **a** Correlations between Ki67 gene expression levels by RNA seq and Ki67 protein expression by IHC illustrating overall concordance between protein and RNA, but no statistical significant difference between PPBC (n = 9) and NPBC (n = 7). P-values are displayed on corresponding axis and are computed based upon students' unpaired two-tailed t-test with Welch correction. **b** Semi quantitative immunohistochemical analysis of CD45 protein expression, (PPBC n = 15, NPBC n = 15) with p values determined by students' unpaired two-tailed t-test with Welch correction. **c** RNA expression analysis of pan-immune expression protein/gene (CD45/PTPRC) between NPBC (n = 7) and PPBC (n = 9) shows no significant difference, p values determine by students' unpaired two-tailed t-test with Welch correction without and with adjustment for multiple comparisons (adj p). **d** Economic inequality modeling based evaluation of normalized T cell clonality (Gini Index) demonstrates enhanced clonality within PPBC cases (n = 9) compared to NPBC (n = 7). **e** Relative make up of T-cell clonal expansion in PPBC (n = 9) or NPBC (n = 7) cohorts expressed as clonal space occupancy: rare (red), small (orange), med (light blue), large (blue) or hyper-expanded (dark blue) clones. **f** CD8+ protein staining by IHC evaluated as percent positive signal of tumor area. P-values determined by students' unpaired two-tailed t-test with Welch correction ( $* p \leq 0.05$ ), or students' unpaired one-tailed t-test with Welch correction for confirmatory IHC (PPBC n = 15, NPBC n = 15). Data depicted in bar graphs are presented as mean values +/- SEM. Samples

evaluated by RNA Seq are depicted by circles and Pseq refers to p-values derived from students' unpaired two-tailed t-test with Welch correction for these samples only (PPBC n = 9, NPBC n = 7). ICGC identified P53 mutations are noted by orange filled circles.

Supplemental figure 3

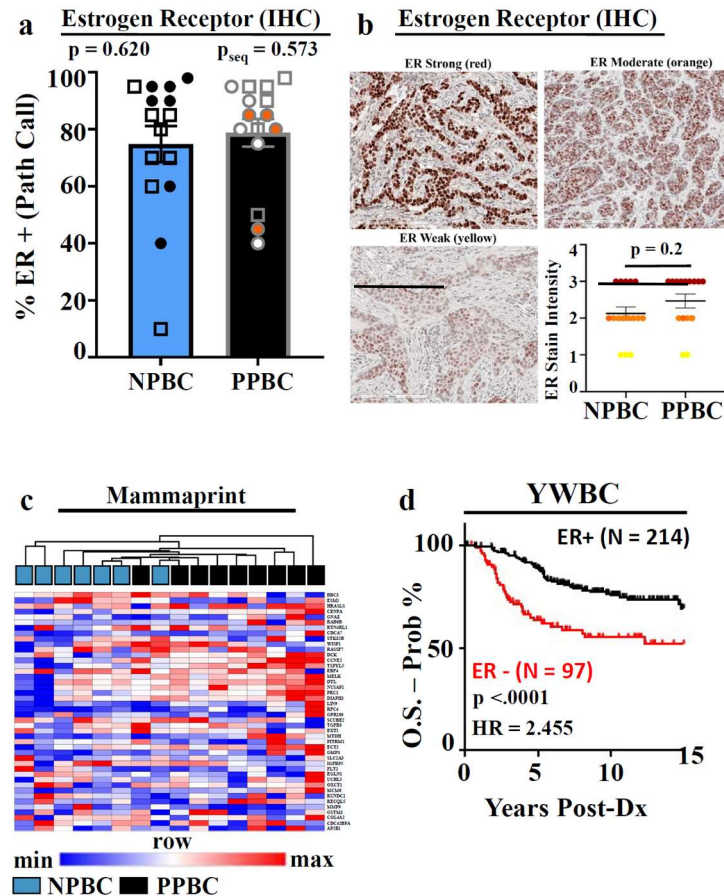

**Supplementary Figure 3 Estrogen Receptor Expression Evaluation and Mammaprint gene clustering comparisons between PPBC and NPBC. Overall survival probability of compiled Young Women’s Breast Cancer cohort by ER status:** All 30 cases (n =15 NPBC, n =15 PPBC) were stained and evaluated for estrogen receptor expression by IHC. **a** Percent tumor ER positive nuclei (brown) was assessed by pathologist screening and recorded with no difference being observed between PPBC and NPBC cases in the RNA seq subset or complete data set. Data are presented as mean values +/- SEM. P-values were determined by students’ unpaired two-tailed t-test with Welch’s correction. Samples evaluated by RNA Seq are depicted by circles and Pseq refers to p-values derived from students’ unpaired two-tailed t-test with Welch correction for these samples only (PPBC n = 9, NPBC n = 7). **b** examples of ER staining intensity and depiction of staining intensity distribution between cohorts (NPBC n = 15, PPBC n = 15) Data are presented as mean values +/- SEM. P-values were determined by students’ unpaired two-tailed t-test with Welch’s correction. Scale bar = 200um. **c** The gene expression values for the forty four genes of Mammaprint® found to be expressed above background levels in these samples were permitted to cluster based upon Z-score transformed Euclidean average linkage parameters, with no clear cluster based upon parity status observed (postpartum breast cancer, PPBC, black, n = 9) or nulliparous breast cancer(NPBC, blue, n = 7). **d** Gene expression profiles for 311 women under the age of 45 at time of a primary breast cancer diagnosis were obtain across seven studies to compile a Young Women’s Breast Cancer (YWBC) cohort. Within this cohort survival probability was assessed when separated by clinically determine ER status (positive-black n = 214, negative-red n = FF97). P-values for survival determine by two-tailed log-rank (Mantel-Cox) evaluation and reported with Log-rank Hazard Ratios.

**Supplemental Table 1a: Clinical characteristics of samples used in RNA sequencing or IHC**

| RNA sample designation | Age at Dx | RACE            | Ethnicity | BMI       | Stage at Dx | ER (%) by IHC | ER (on IHC) | PR (on IHC) | Her-2 (on IHC) | Parity      | PAM50 designation by RNA seq |
|------------------------|-----------|-----------------|-----------|-----------|-------------|---------------|-------------|-------------|----------------|-------------|------------------------------|
| S01                    | 40        | white           | NH        | 29.37284  | 2A          | 40            | pos         | pos         | neg            | Nulliparous | Her2                         |
| S02                    | 33        | white           | NH        | 23.159462 | 2A          | 40            | pos         | neg         | pos            | Postpartum  | Basal                        |
| S03                    | 44        | Filipino        | NH        | 27.981009 | 3A          | 95            | pos         | pos         | neg            | Nulliparous | Lum B                        |
| S04                    | 34        | white           | NH        | 24.40488  | 3A          | 80            | pos         | pos         | neg            | Postpartum  | Lum A                        |
| S05                    | 36        | white           | NH        | 22.683304 | 2A          | 90            | pos         | pos         | neg            | Nulliparous | Lum A                        |
| S06                    | 43        | Black           | NH        | 21.464417 | 2A          | 98            | pos         | neg         | equiv          | Nulliparous | Lum A                        |
| S07                    | 36        | white           | NH        | 25.921567 | 2A          | 75            | pos         | pos         | neg            | Postpartum  | Lum B                        |
| S08                    | 34        | white           | NH        | 33.844468 | 2B          | 85            | pos         | pos         | equiv          | Postpartum  | Lum B                        |
| S09                    | 43        | white           | NH        | 25.165958 | 2A          | 60            | pos         | pos         | equiv          | Nulliparous | Lum B                        |
| S10                    | 32        | white           | NH        | 25.676607 | 3C          | 45            | pos         | pos         | missing        | Postpartum  | Her2                         |
| S11                    | 30        | Black           | NH        | 40.197555 | 3A          | 90            | pos         | pos         | neg            | Nulliparous | Lum A                        |
| S12                    | 35        | American Indian | NH        | 53.168585 | 2B          | 90            | pos         | pos         | neg            | Postpartum  | Lum A                        |
| S13                    | 33        | white           | NH        | 31.77487  | 2B          | 85            | pos         | pos         | discord        | Postpartum  | Lum A                        |
| S14                    | 38        | white           | NH        | 29.986427 | 2B          | 95            | pos         | pos         | neg            | Nulliparous | Lum B                        |
| S15                    | 37        | white           | NH        | 21.560711 | 2B          | 80            | pos         | neg         | equiv          | Postpartum  | Lum B                        |
| S16                    | 34        | white           | NH        | 33.548668 | 3A          | 95            | pos         | pos         | neg            | Postpartum  | Lum B                        |
| IHC17                  | 40        | white           | NH        | 30.893555 | 3C          | 85            | pos         | pos         | neg            | Nulliparous | NA                           |
| IHC18                  | 45        | white           | NH        | 33.629132 | 2B          | 70            | pos         | pos         | equiv          | Nulliparous | NA                           |
| IHC19                  | 38        | white           | Unknown   | NA        | 2B          | 70            | pos         | pos         | missing        | Nulliparous | NA                           |
| IHC20                  | 30        | Chinese         | NH        | 19.202653 | 2A          | 85            | pos         | pos         | neg            | Nulliparous | NA                           |
| IHC21                  | 45        | white           | NH        | 30.69573  | 3C          | 60            | pos         | pos         | neg            | Nulliparous | NA                           |
| IHC22                  | 39        | white           | NH        | 34.776131 | 2A          | 95            | pos         | pos         | discord        | Nulliparous | NA                           |
| IHC23                  | 40        | white           | NH        | 26.545306 | 2A          | 10            | pos         | neg         | pos            | Nulliparous | NA                           |
| IHC24                  | 44        | white           | NH        | 34.199011 | 2B          | 80            | pos         | pos         | neg            | Nulliparous | NA                           |
| IHC25                  | 32        | white           | NH        | 22.919678 | 3A          | 90            | pos         | pos         | neg            | Postpartum  | NA                           |
| IHC26                  | 32        | white           | NH        | 24.543213 | 2B          | 50            | pos         | pos         | neg            | Postpartum  | NA                           |
| IHC27                  | 37        | white           | NH        | 23.144212 | 2A          | 80            | pos         | pos         | neg            | Postpartum  | NA                           |
| IHC28                  | 44        | Black           | NH        | 29.570878 | 2B          | 98            | pos         | pos         | neg            | Postpartum  | NA                           |
| IHC29                  | 45        | white           | NH        | 23.098571 | 2A          | 95            | pos         | pos         | equiv          | Postpartum  | NA                           |
| IHC30                  | 36        | white           | NH        | 27.365917 | 3C          | 95            | pos         | neg         | pos            | Postpartum  | NA                           |

NH = Non-Hispanic, Pos = Positive, Neg = Negative, NA = Not Available, equiv = Equivalent, Discord = discordant

**Supplemental Table 1b: Clinical characteristic comparison on the postpartum and nulliparous breast cancer cohorts**

| <b>Clinical characteristics</b> | <b>Nulliparous cancer</b> | <b>Postpartum breast cancer</b> | <b>P-value</b> |
|---------------------------------|---------------------------|---------------------------------|----------------|
| <b>Overall N</b>                | 15                        | 15                              |                |
| <b>Age at dx, mean (SD)</b>     | 39.6 ( $\pm$ 4.8)         | 35.6 ( $\pm$ 4.0)               | 0.02           |
| <b>Pre-menopausal</b>           | 15                        | 15                              |                |
| <b>BMI</b>                      | 29.0                      | 28.2                            | 0.38           |
| <b>Race</b>                     |                           |                                 |                |
| White                           | 11                        | 14                              |                |
| Black                           | 2                         | 1                               |                |
| Other                           | 2                         | 1                               |                |
| <b>Stage</b>                    |                           |                                 |                |
| 1                               | 0                         | 0                               | >0.9*          |
| 2                               | 11                        | 10                              |                |
| 3                               | 4                         | 5                               |                |
| 4                               | 0                         | 0                               |                |
| <b>ER status</b>                |                           |                                 |                |
| Pos                             | 15                        | 15                              |                |
| Neg                             | 0                         | 0                               |                |
| <b>PR status</b>                |                           |                                 |                |
| Pos                             | 13                        | 12                              | >0.9*          |
| Neg                             | 2                         | 3                               |                |
| <b>HER2 status</b>              |                           |                                 |                |
| Pos                             | 1                         | 2                               | 0.35           |
| Neg                             | 9                         | 8                               |                |
| Discordant/equivocal            | 4                         | 4                               |                |
| missing                         | 1                         | 1                               |                |

P-value \* is based on Kolmogorov-Smirnov test
