# Supplementary material for: Postpartum breast cancer has a distinct molecular profile that predicts poor outcomes
Source: PubMed Central journal article supplement (PMC8566602; doi:10.1038/s41467-021-26505-3), 2021-11-03
Supplement: 41467_2021_26505_MOESM3_ESM.pdf [file 41467_2021_26505_MOESM3_ESM.pdf]

### **Description of Additional Supplementary Files**

File Name: Supplementary Data 1

Description: Annotated GSEA Gene Dataset GMX Matrix

File Name: Supplementary Data 2

Description: Full Results of Cibersort Analysis performed for Figures 4E and 4F
